# Supplementary material for: Investigation of structural, optical and electrical conductivity of a new organic inorganic bromide: [C12H17N2]2ZnBr4
Source: Royal Society of Chemistry journal article supplement (doi:10.1039/d3ra00561e), 2023-01-01
Supplement: d3ra00561e1.pdf [file d3ra00561e1.pdf]

**Table S1:** Bond lengths (Å) and angles (°) of the  $[\text{ZnBr}_4]^{2-}$  tetrahedron

| <b><math>[\text{ZnBr}_4]^{2-}</math> anions</b> |             |            |            |
|-------------------------------------------------|-------------|------------|------------|
| Zn—Br4                                          | 2.3638 (11) | Br4—Zn—Br3 | 108.27 (4) |
| Zn—Br3                                          | 2.3972 (10) | Br4—Zn—Br1 | 110.69 (4) |
| Zn—Br1                                          | 2.4113 (11) | Br3—Zn—Br1 | 112.50 (4) |
| Zn—Br2                                          | 2.4464 (10) | Br4—Zn—Br2 | 113.89 (4) |
|                                                 |             | Br3—Zn—Br2 | 106.12 (4) |
|                                                 |             | Br1—Zn—Br2 | 105.35 (4) |

**Table S2:** Bond lengths (Å) and angles (°) of the organic cations of [C<sub>12</sub>H<sub>17</sub>N<sub>2</sub>]<sub>2</sub>[ZnBr<sub>4</sub>]

| <b>Organic Cations</b> |            |             |            |
|------------------------|------------|-------------|------------|
| N1B—C23                | 1.284·(8)  | C5—C4       | 1.359·(10) |
| N1B—C13                | 1.421·(9)  | C3—C4       | 1.372·(10) |
| C1—C2                  | 1.382·(9)  | C13—C18     | 1.358·(10) |
| C1—C6                  | 1.393·(9)  | C13—C14     | 1.371·(10) |
| C11—C12                | 1.464·(9)  | C19—N2B     | 1.454·(9)  |
| C11—C10                | 1.489·(10) | C23—C24     | 1.440·(10) |
| C7—N2A                 | 1.430·(9)  | C14—C15     | 1.341·(10) |
| C7—C9                  | 1.503·(10) | C18—C17     | 1.385·(11) |
| C7—C10                 | 1.529·(9)  | C17—C16     | 1.375·(11) |
| C7—C8                  | 1.539·(10) | C16—C15     | 1.378·(11) |
| C2—C3                  | 1.384·(9)  | C22—C19     | 1.510·(9)  |
| C6—N2A                 | 1.354·(9)  | C22—C23     | 1.489·(9)  |
| C6—C5                  | 1.407·(9)  |             |            |
| C11—N1A—C1             | 133.3·(6)  | C18—C13—C14 | 120.0·(7)  |
| C23—N1B—C13            | 127.6·(7)  | C18—C13—N1B | 121.9·(6)  |
| C2—C1—C6               | 120.9·(6)  | C14—C13—N1B | 118.0·(7)  |
| C2—C1—N1A              | 113.6·(6)  | N2B—C19—C20 | 111.2·(8)  |
| C6—C1—N1A              | 125.5·(6)  | N2B—C19—C22 | 109.7·(6)  |
| N1A—C11—C12            | 119.4·(7)  | C20—C19—C22 | 112.6·(7)  |
| N1A—C11—C10            | 119.5·(6)  | N2B—C19—C21 | 105.2·(7)  |
| C12—C11—C10            | 121.1·(7)  | C20—C19—C21 | 108.5·(9)  |
| N2A—C7—C9              | 110.9·(7)  | C22—C19—C21 | 109.4·(7)  |
| N2A—C7—C10             | 110.3·(6)  | C11—C10—C7  | 114.3·(6)  |
| C9—C7—C10              | 110.6·(6)  | C5—C4—C3    | 120.8·(7)  |
| N2A—C7—C8              | 106.6·(6)  | C18—N2B—C19 | 122.8·(7)  |
| C9—C7—C8               | 109.7·(7)  | N1B—C23—C24 | 119.8·(7)  |
| C10—C7—C8              | 108.7·(6)  | N1B—C23—C22 | 117.6·(7)  |
| C1—C2—C3               | 121.3·(7)  | C24—C23—C22 | 121.7·(7)  |
| N2A—C6—C1              | 127.1·(6)  | C15—C14—C13 | 122.4·(8)  |
| N2A—C6—C5              | 116.7·(7)  | C13—C18—C17 | 119.0·(7)  |
| C1—C6—C5               | 116.2·(7)  | C13—C18—N2B | 119.7·(7)  |
| C6—N2A—C7              | 130.0·(6)  | C17—C18—N2B | 120.6·(8)  |
| C23—C22—C19            | 113.8·(6)  | C16—C17—C18 | 119.6·(8)  |
| C4—C5—C6               | 122.4·(7)  | C17—C16—C15 | 121.0·(8)  |
| C4—C3—C2               | 118.3·(7)  | C14—C15—C16 | 118.0·(8)  |

**Table S3:** Hydrogen bonds geometry of of [C<sub>12</sub>H<sub>17</sub>N<sub>2</sub>]<sub>2</sub>[ZnBr<sub>4</sub>]

| <i>D—H···A</i>               | <i>D—H</i> | <i>H···A</i> | <i>D···A</i> | <i>D—H···A</i> |
|------------------------------|------------|--------------|--------------|----------------|
| N1A—H1A···Br2 <sup>i</sup>   | 0.86       | 2.71         | 3.566•(5)    | 171            |
| N1B—H1B···Br1 <sup>ii</sup>  | 0.86       | 2.86         | 3.578•(6)    | 142            |
| N1B—H1B···Br2 <sup>ii</sup>  | 0.86       | 2.96         | 3.626•(6)    | 135            |
| N2A—H2A···Br3 <sup>iii</sup> | 0.86       | 3.02         | 3.806•(7)    | 153            |
| N2B—H2B···Br1                | 0.86       | 2.82         | 3.576•(6)    | 147            |
| C22—H22A···Br4 <sup>iv</sup> | 0.97       | 2.91         | 3.876•(7)    | 174            |

**Symmetry codes:** (i)  $x, y+1, z$ ; (ii)  $-x+3/2, y+1/2, -z+3/2$ ; (iii)  $-x+3/2, y+1/2, -z+1/2$ ; (iv)  $-x+1, -y+1, -z+1$ .
